# Supplementary material for: Identification of Nine Novel Loci Associated with White Blood Cell Subtypes in a Japanese Population
Source: PLoS Genet. 2011 Jun 30;7(6):e1002067. doi: 10.1371/journal.pgen.1002067 (PMC3128095; doi:10.1371/journal.pgen.1002067)
Supplement: Table S3 — Results of genome-wide association studies for the WBC subtypes. (DOC) [file pgen.1002067.s004.doc]

**Table S3**. Results of genome-wide association studies for the WBC subtypes.

| WBC |  |  |  |  |  | EA/ | GWAS (n=8,794) | | | |  | Validation (n=5,998) | |  | Combined (n=14,792) | |
| --- | --- | --- | --- | --- | --- | --- | --- | --- | --- | --- | --- | --- | --- | --- | --- | --- |
| subtype | rsIDa | Chr | Position | Cytoband | Gene | non-EAb | Freq.c | *Rsq*d | Beta (SE)e | *P* |  | Beta (SE)e | *P* |  | Beta (SE)e | *P* |
| Basophil | rs11587438 | 1 | 6,554,018 | 1p36 | *TAS1R1* | T/C | 0.83 | 0.87 | 0.098 (0.015) | 4.2×10-6 |  | 0.041 (0.025) | 0.10 |  | 0.075 (0.016) | 3.7×10-6 |
| Eosinophil | rs6576878 | 1 | 87,477,619 | 1p22 | *LMO4* | G/A | 0.43 | - | 0.072 (0.015) | 2.1×10-6 |  | 0.024 (0.018) | 0.20 |  | 0.053 (0.012) | 6.0×10-6 |
| Basophil | rs12748961 | 1 | 203,942,886 | 1q32 | *SLC45A3-NUKS1* | T/C | 0.51 | 0.95 | 0.073 (0.015) | 2.6×10-6 |  | 0.050 (0.019) | 0.0069 |  | 0.064 (0.012) | 4.2×10-8 |
| Basophil | rs796486 | 1 | 218,952,235 | 1q41 | *C1orf115* | C/A | 0.42 | - | 0.071 (0.015) | 3.4×10-6 |  | -0.001 (0.018) | 0.94 |  | 0.042 (0.012) | 3.0×10-4 |
| Eosinophil | rs17027258 | 2 | 102,457,972 | 2q12 | *SLC9A4* | G/A | 0.37 | 0.99 | 0.075 (0.016) | 1.4×10-6 |  | 0.027 (0.019) | 0.16 |  | -0.055 (0.012) | 7.2×10-6 |
| Monocyte | rs7578982 | 2 | 111,553,009 | 2q13 | *ACOXL* | T/C | 0.55 | - | 0.071 (0.014) | 7.1×10-7 |  | 0.030 (0.016) | 0.063 |  | 0.054 (0.011) | 4.1×10-7 |
| Lymphocyte | rs1228080 | 2 | 146,319,129 | 2q22 | no gene | C/T | 0.79 | 0.85 | 0.093 (0.020) | 2.1×10-6 |  | 0.030 (0.023) | 0.19 |  | 0.066 (0.015) | 1.3×10-5 |
| Monocyte | rs12988934 | 2 | 182,031,910 | 2q31 | *ITGA4* | T/C | 0.27 | 0.93 | 0.116 (0.019) | 8.4×10-10 |  | 0.100 (0.021) | 3.5×10-6 |  | 0.109 (0.014) | 2.0×10-14 |
| Basophil | rs4328821 | 3 | 129,799,125 | 3q21 | *GATA2* | A/G | 0.66 | 1.00 | 0.154 (0.016) | 4.4×10-22 |  | 0.171 (0.019) | 1.1×10-19 |  | 0.161 (0.012) | 5.3×10-40 |
| Eosinophil | rs4328821 | 3 | 129,799,125 | 3q21 | *GATA2* | A/G | 0.66 | 1.00 | 0.087 (0.016) | 3.9×10-8 |  | 0.125 (0.019) | 3.6×10-11 |  | 0.103 (0.012) | 3.3×10-17 |
| Neutrophil | rs546829 | 4 | 75,175,236 | 4q13 | *CXCL2* | A/T | 0.43 | 0.97 | 0.075 (0.015) | 1.1×10-6 |  | 0.037 (0.018) | 0.043 |  | 0.060 (0.012) | 2.5×10-7 |
| Basophil | rs10040209 | 5 | 74,389,291 | 5q13 | *GCNT4* | G/A | 0.80 | 0.86 | 0.095 (0.021) | 3.9×10-6 |  | 0.014 (0.024) | 0.58 |  | 0.060 (0.016) | 1.5×10-4 |
| Monocyte | rs9968917 | 6 | 7,212,001 | 6p24 | *RREB1-SSR1* | A/C | 0.31 | 0.98 | 0.085 (0.016) | 4.6×10-8 |  | -0.001 (0.018) | 0.96 |  | 0.046 (0.012) | 9.2×10-5 |
| Monocyte | rs3095254 | 6 | 31,329,647 | 6p21 | MHC region | C/G | 0.46 | 0.90 | 0.085 (0.015) | 1.5×10-8 |  | 0.060 (0.017) | 5.1×10-4 |  | 0.074 (0.011) | 5.6×10-11 |
| Eosinophil | rs2516399 | 6 | 31,589,278 | 6p21 | MHC region | A/G | 0.81 | - | 0.111 (0.019) | 4.4×10-9 |  | 0.095 (0.024) | 7.0×10-5 |  | 0.105 (0.015) | 1.8×10-12 |
| Eosinophil | rs9373124 | 6 | 135,464,902 | 6q23 | *HBS1L-MYB* | T/C | 0.65 | 0.96 | 0.101 (0.016) | 4.1×10-10 |  | 0.048 (0.020) | 0.015 |  | 0.080 (0.012) | 1.3×10-10 |
| Eosinophil | rs12670783 | 7 | 92,146,734 | 7q21 | *CDK6* | A/G | 0.53 | 0.98 | 0.071 (0.015) | 3.3×10-6 |  | 0.002 (0.018) | 0.90 |  | 0.043 (0.012) | 1.8×10-4 |
| Neutrophil | rs445 | 7 | 92,246,306 | 7q21 | *CDK6* | C/T | 0.69 | - | 0.074 (0.016) | 4.3×10-6 |  | 0.078 (0.019) | 4.5×10-5 |  | 0.076 (0.012) | 6.6×10-10 |
| Monocyte | rs1861113 | 7 | 93,721,303 | 7q21 | *COL1A2* | G/A | 0.77 | 0.77 | 0.089 (0.019) | 3.2×10-6 |  | 0.024 (0.022) | 0.27 |  | 0.061 (0.014) | 2.1×10-5 |
| Eosinophil | rs2642487 | 7 | 146,018,215 | 7q35 | *CNTNAP2* | C/A | 0.31 | - | 0.077 (0.016) | 2.6×10-6 |  | -0.023 (0.020) | 0.25 |  | 0.037 (0.012) | 0.0026 |
| Basophil | rs11761588 | 7 | 150,724,981 | 7q36 | *WDR86* | C/T | 0.87 | - | 0.107 (0.022) | 1.5×10-6 |  | -0.006 (0.027) | 0.82 |  | 0.061 (0.017) | 3.1×10-4 |
| Monocyte | rs10956483 | 8 | 130,641,292 | 8q24 | *MLZE* | C/G | 0.44 | 0.97 | 0.070 (0.015) | 2.0×10-6 |  | 0.072 (0.017) | 1.6×10-5 |  | 0.071 (0.011) | 2.1×10-10 |
| Basophil | rs2316799 | 9 | 90,710,882 | 9q22 | *EDG3* | A/C | 0.30 | 0.82 | 0.082 (0.018) | 4.7×10-6 |  | 0.007 (0.022) | 0.75 |  | 0.051 (0.014) | 2.1×10-4 |
| Basophil | rs11018874 | 11 | 89,515,085 | 11q14 | *NAALAD2* | G/A | 0.69 | 0.96 | 0.089 (0.017) | 8.2×10-8 |  | 0.062 (0.020) | 0.0017 |  | 0.077 (0.013) | 1.8×10-9 |
| Neutrophil | rs11056970 | 12 | 16,558,431 | 12p12 | *LMD3* | C/A | 0.83 | 0.96 | 0.090 (0.019) | 3.9×10-6 |  | -0.004 (0.023) | 0.88 |  | 0.052 (0.015) | 3.9×10-4 |
| Neutrophil | rs2188380 | 12 | 109,870,510 | 12q24 | *MYL2-CUTL2* | C/T | 0.21 | 0.71 | 0.099 (0.021) | 2.5×10-6 |  | 0.007 (0.025) | 0.77 |  | 0.062 (0.016) | 1.4×10-4 |
| Basophil | rs9550568 | 13 | 29,954,281 | 13q12 | *HMGB1* | T/C | 0.86 | - | 0.105 (0.022) | 9.8×10-7 |  | 0.023 (0.025) | 0.37 |  | 0.070 (0.017) | 2.6×10-5 |
| Monocyte | rs10147992 | 14 | 24,573,639 | 14q12 | *STXBP6* | G/A | 0.47 | 0.98 | 0.084 (0.014) | 5.5×10-9 |  | 0.029 (0.017) | 0.085 |  | 0.061 (0.011) | 1.2×10-8 |
| Neutrophil | rs4794822 | 17 | 35,410,238 | 17q21 | *PSMD3-CSF3* | T/C | 0.52 | 1.00 | 0.099 (0.015) | 4.5×10-11 |  | 0.085 (0.018) | 1.6×10-6 |  | 0.093 (0.011) | 4.0×10-16 |
| Eosinophil | rs8079078 | 17 | 63,251,628 | 17q24 | *BPTF* | C/A | 0.82 | - | 0.093 (0.020) | 3.0×10-6 |  | 0.031 (0.024) | 0.19 |  | 0.067 (0.015) | 1.1×10-5 |
| Lymphocyte | rs7237848 | 18 | 4,763,110 | 18p11 | no gene | T/C | 0.33 | 0.88 | 0.082 (0.017) | 7.6×10-7 |  | 0.048 (0.019) | 0.013 |  | 0.067 (0.013) | 1.5×10-7 |
| Basophil | rs8083155 | 18 | 62,501,525 | 18q22 | *CDH19* | T/A | 0.54 | 1.00 | 0.081 (0.015) | 6.2×10-8 |  | 0.005 (0.018) | 0.81 |  | 0.051 (0.012) | 1.4×10-5 |
| Lymphocyte | rs10404146 | 19 | 58,696,352 | 19q13 | *ZNF813-ZNF331* | A/T | 0.83 | 0.90 | 0.099 (0.021) | 3.8×10-6 |  | -0.040 (0.023) | 0.087 |  | 0.037 (0.016) | 1.8×10-2 |
| Eosinophil | rs7259060 | 19 | 60,943,102 | 19q13 | *NLRP9* | G/A | 0.44 | 0.98 | 0.093 (0.015) | 1.2×10-9 |  | -0.019 (0.018) | 0.30 |  | 0.048 (0.012) | 3.5×10-5 |
| Eosinophil | rs331615 | 20 | 55,071,944 | 20q13 | *BMP7* | T/A | 0.37 | 0.94 | 0.080 (0.016) | 6.8×10-7 |  | 0.032 (0.019) | 0.099 |  | 0.060 (0.012) | 9.4×10-7 |
| Basophil | rs7275212 | 21 | 38,774,421 | 21q22 | *ERG* | T/A | 0.08 | 0.93 | 0.191 (0.029) | 3.5×10-11 |  | 0.205 (0.035) | 6.4×10-9 |  | 0.197 (0.022) | 1.6×10-18 |

aSNPs that satisfied *P* < 5.0 × 10-6 in any of the GWASs for the WBC subtypes are indicated.

bThe allele that increased the count of the corresponding WBC subtype in the GWAS was denoted as effect allele (EA) and is indicated based on the forward strand.

cFrequency of effect allele in the subjects enrolled in the GWAS.

dImputation score of *Rsq* by MACH 1.0. For the genotyped SNP, "-" is indicated.

eEffect size of effect allele on the normalized trait.

WBC, white blood cell; GWAS, Genome-wide association study; SE, standard error.
